# Supplementary material for: Simulating heat and CO 2 fluxes in Beijing using SUEWS V2020b: Sensitivity to vegetation phenology and maximum conductance
Source: Copernicus journal article supplement (doi:10.5194/gmd-2022-305), 2023-02-09
Supplement: Supplementary file [file gmd-2022-305-AC1-supplement.pdf]

## Added tables in Supplementary Materials:

**Table S4.** Adjusted albedo ( $\alpha_i$ ) for different surfaces: buildings (Bldgs), paved surface (Paved), evergreen tree/shrub (Everg), deciduous tree/shrub (Dec), grass, and water following Ward et al (2016). The  $\alpha_i$  for deciduous tree/shrub and grass are allowed to vary from a lower value in summer to a higher value in winter.

|            | Unit | Bldgs | Paved | Everg | Dec       | Grass     | Water |
|------------|------|-------|-------|-------|-----------|-----------|-------|
| $\alpha_i$ | –    | 0.12  | 0.10  | 0.10  | 0.12-0.18 | 0.18-0.21 | 0.10  |

**Table S5.** SUEWS model performance statistics with adjusted albedo ( $\alpha_i$ ) (Table S4) for radiation fluxes, including incoming solar radiation ( $K_{down}$ ), outgoing shortwave radiation ( $K_{up}$ ), incoming longwave radiation ( $L_{down}$ ), outgoing longwave radiation ( $L_{up}$ ), and net radiation ( $Q_N$ ) from May 2010 to June 2011.

|            | Season | R <sup>2</sup> | RMSE  | MBE   | N    |
|------------|--------|----------------|-------|-------|------|
| $K_{down}$ | DJF    | 0.94           | 52.3  | 19.5  | 2160 |
|            | MAM    | 0.93           | 82.6  | 19.8  | 2940 |
|            | JJA    | 0.86           | 110.4 | 39.3  | 2728 |
|            | SON    | 0.93           | 59.6  | 16.6  | 2150 |
| $K_{up}$   | DJF    | 0.88           | 8.3   | -2.5  | 2160 |
|            | MAM    | 0.92           | 10.1  | 0.2   | 2940 |
|            | JJA    | 0.88           | 13.6  | 4.6   | 2728 |
|            | SON    | 0.91           | 8.4   | 0.6   | 2150 |
| $L_{down}$ | DJF    | 0.74           | 16.0  | -2.4  | 2160 |
|            | MAM    | 0.86           | 20.5  | -10.0 | 2940 |
|            | JJA    | 0.68           | 18.1  | 8.8   | 2728 |
|            | SON    | 0.88           | 23.7  | 12.9  | 2150 |
| $L_{up}$   | DJF    | 0.80           | 15.7  | 4.0   | 2160 |
|            | MAM    | 0.90           | 19.1  | 3.6   | 2940 |
|            | JJA    | 0.79           | 22.5  | 10.7  | 2728 |
|            | SON    | 0.90           | 18.9  | 9.4   | 2150 |
| $Q_N$      | DJF    | 0.94           | 40.5  | 15.6  | 2160 |
|            | MAM    | 0.93           | 64.6  | 6.0   | 2940 |
|            | JJA    | 0.86           | 88.8  | 32.8  | 2728 |
|            | SON    | 0.92           | 51.8  | 19.5  | 2150 |

## Modified figures:

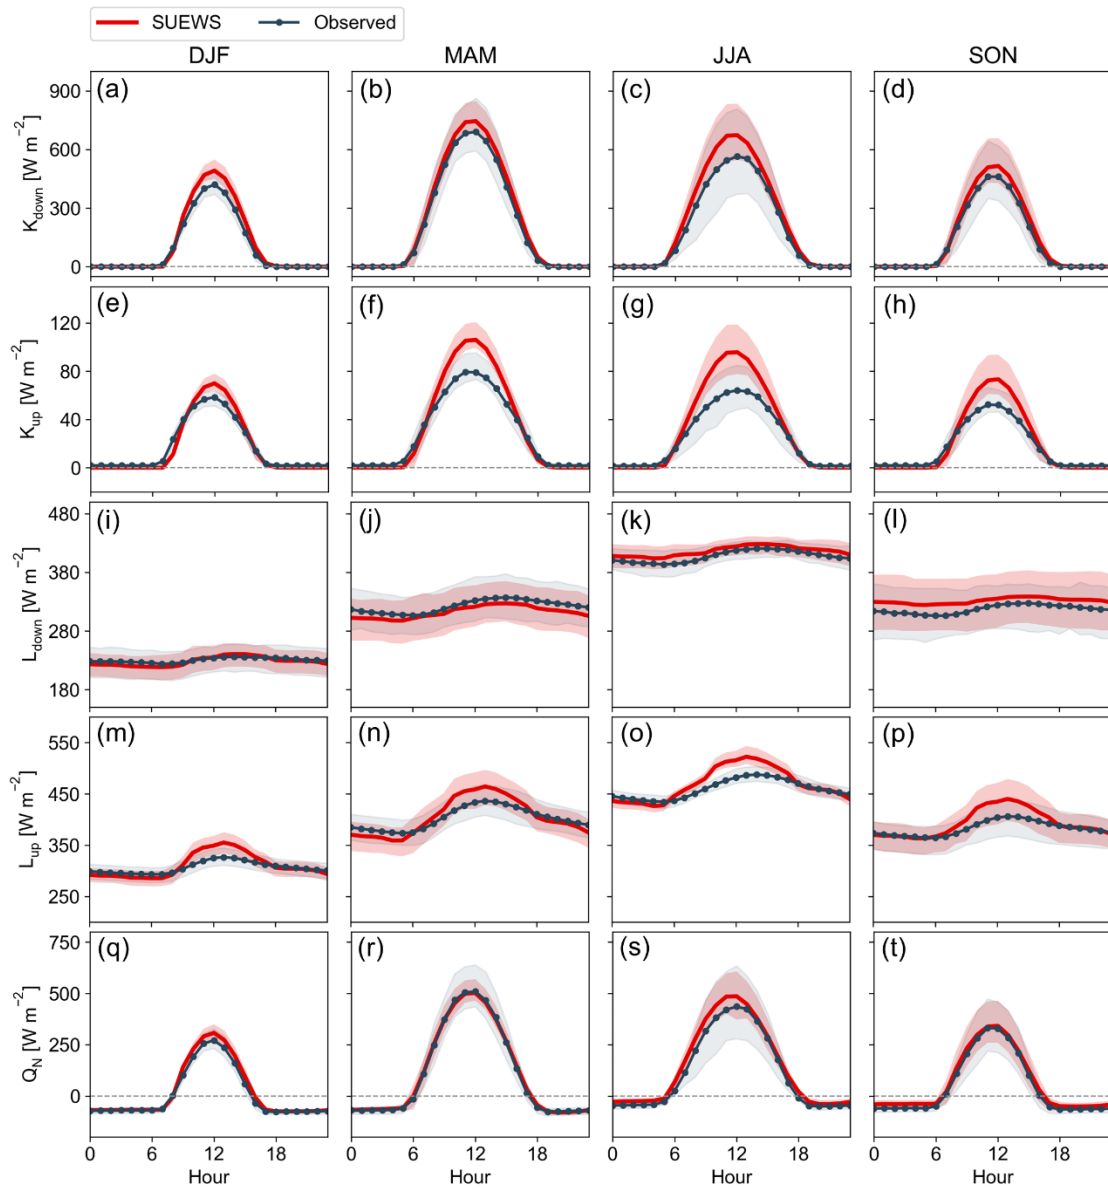

Modified **Figure 5**. Average diurnal cycle of input or modelled and observed hourly radiation fluxes by season, including (a–d) incoming solar radiation ( $K_{down}$ ), (e–h) outgoing shortwave radiation ( $K_{up}$ ), (i–l) incoming longwave radiation ( $L_{down}$ ), (m–p) outgoing longwave radiation ( $L_{up}$ ), and (q–t) net radiation ( $Q_N$ ) from May 2010 to June 2011. Shaded area denotes the interquartile range. Note that only  $K_{down}$  is input and the rest are model output.

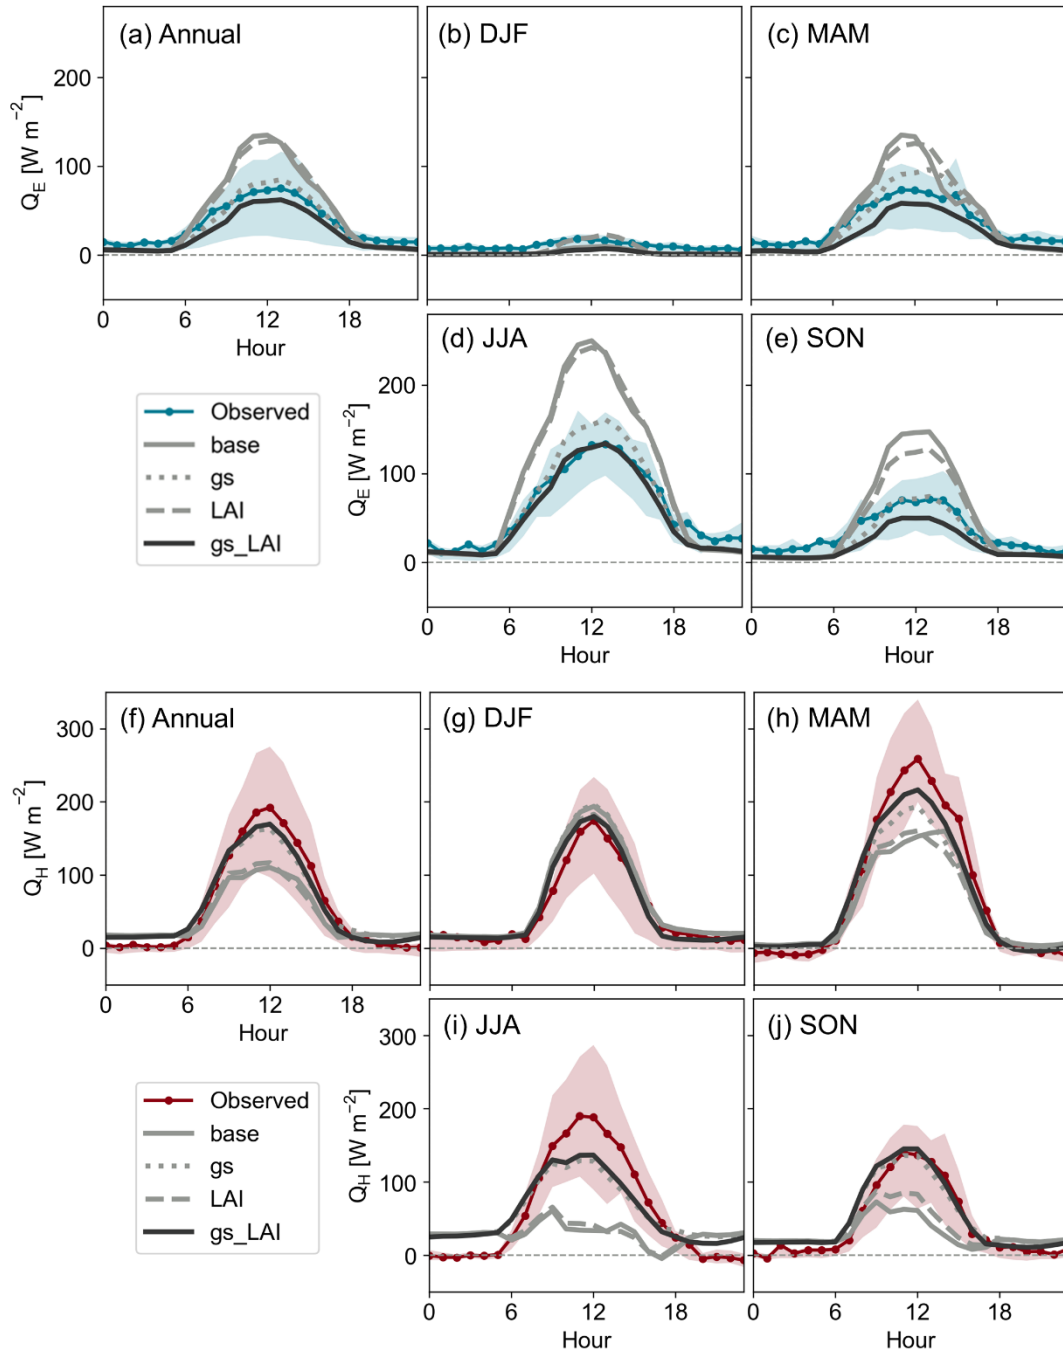

Modified **Figure 6**. Annual and seasonal mean diurnal cycles of observed and modelled (a–e) latent heat flux ( $Q_E$ ) and (f–j) sensible heat flux ( $Q_H$ ) for the four model runs (case **base**, **gs**, **LAI**, and **gs\_LAI**) in the year 2016. Shaded area denotes the interquartile range.

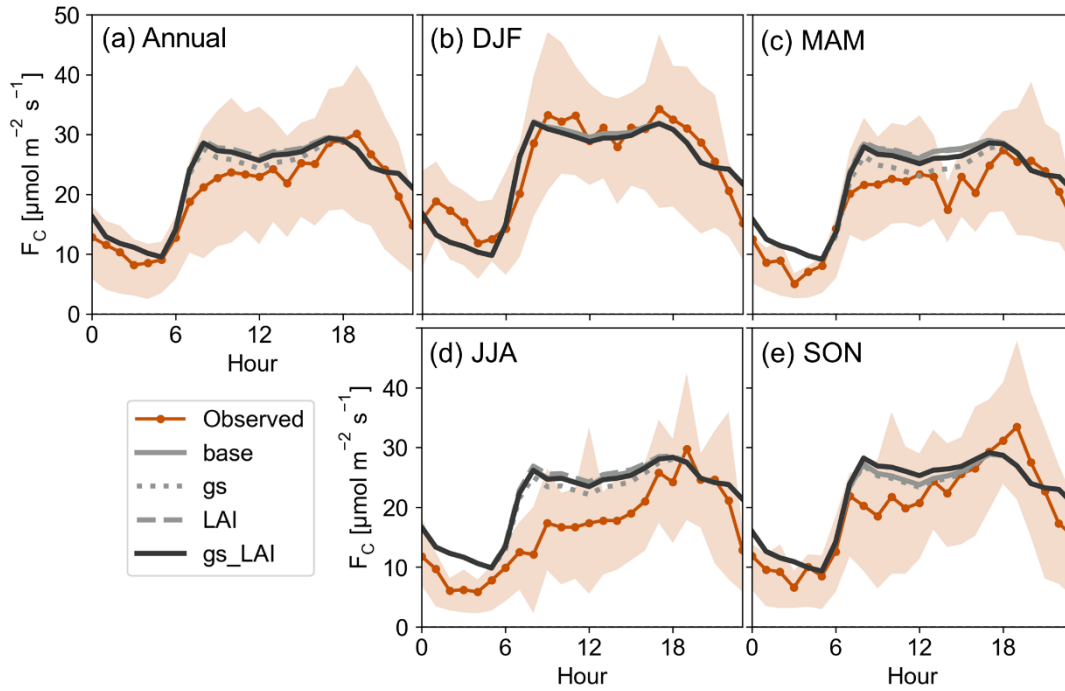

Modified **Figure 8**. Annual and seasonal average diurnal cycles of observed and modelled CO<sub>2</sub> flux ( $F_C$ ) for the four model runs (case **base**, **gs**, **LAI**, and **gs\_LAI**) in the year 2016. Shaded area denotes the interquartile range.

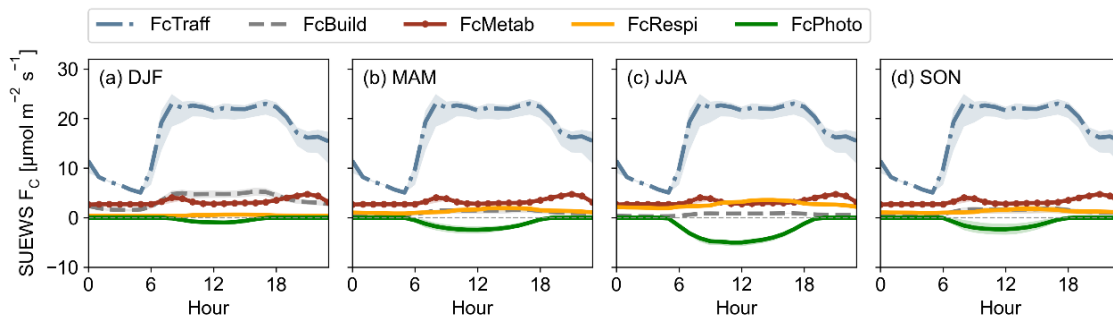

Modified **Figure 9**. Seasonal average diurnal cycles of modelled CO<sub>2</sub> flux ( $F_C$ ) components by case **gs\_LAI** in 2016.  $F_C$ Traff denotes  $F_C$  from on-road traffic,  $F_C$ Building building,  $F_C$ Metab human metabolism,  $F_C$ Respi vegetation and soil respiration, and  $F_C$ Photo vegetation photosynthesis. Positive values indicate sources of CO<sub>2</sub> and negative values sinks with respect to the atmosphere. Shaded area denotes the interquartile range.
